# Supplementary material
Source: publisher figshare collection journal article supplement (https://tandf.figshare.com/ndownloader/files/14720321)
Supplement: Supplementary file 1 [file 14720321]

**Supplement**


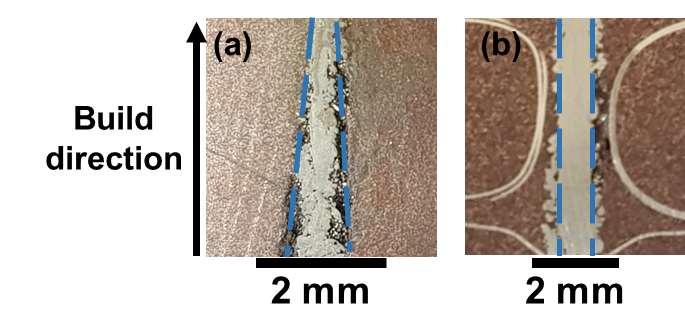


Figure S1. Cross sectional images of DED-printed pure tungsten samples. (a) Triangular structure fabricated at *F* = 228 J/mm2 and (b) structure with constant width fabricated at *F* = 237 J/mm2.


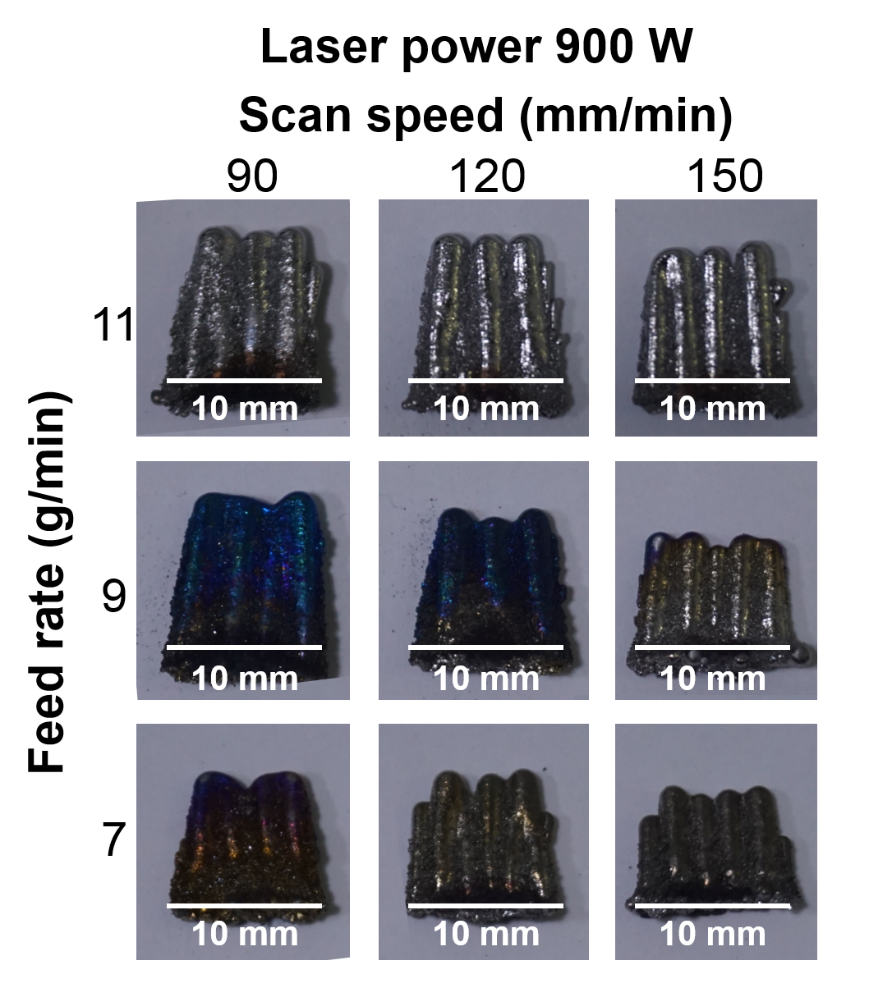


Figure S2. Samples fabricated at 21.6 m/s in carrier gas velocity.


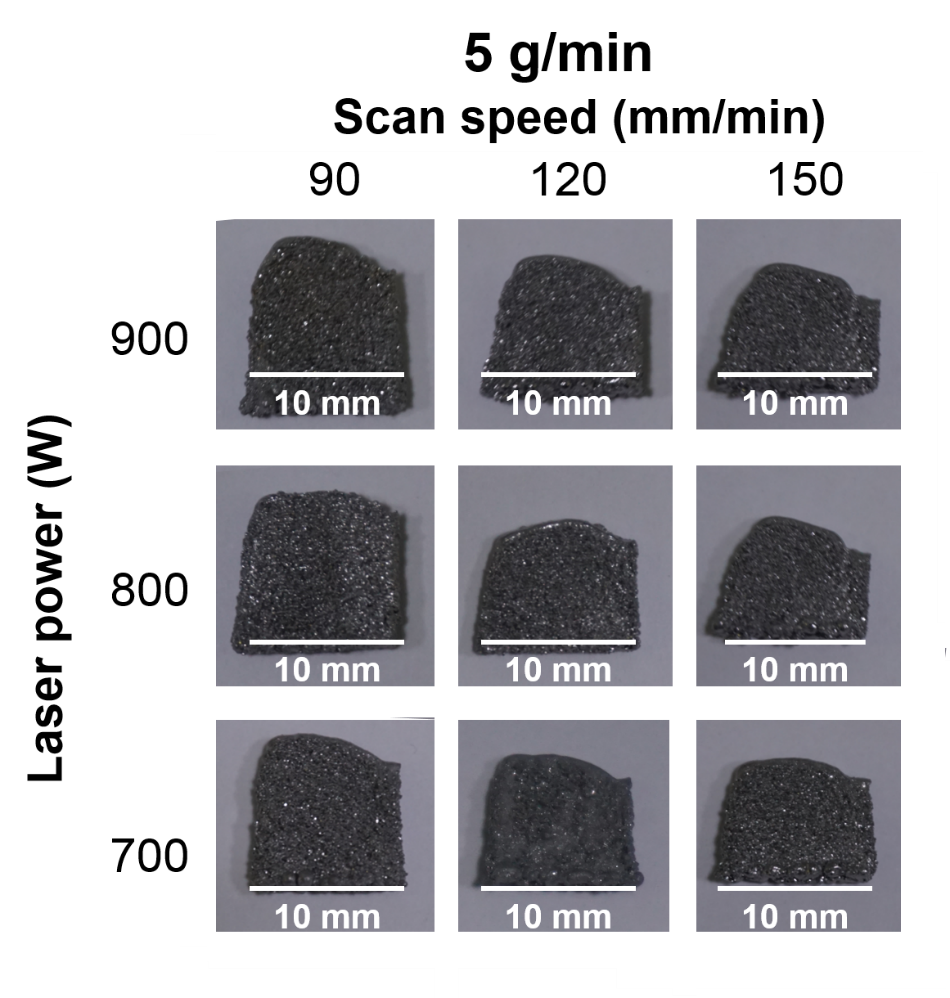

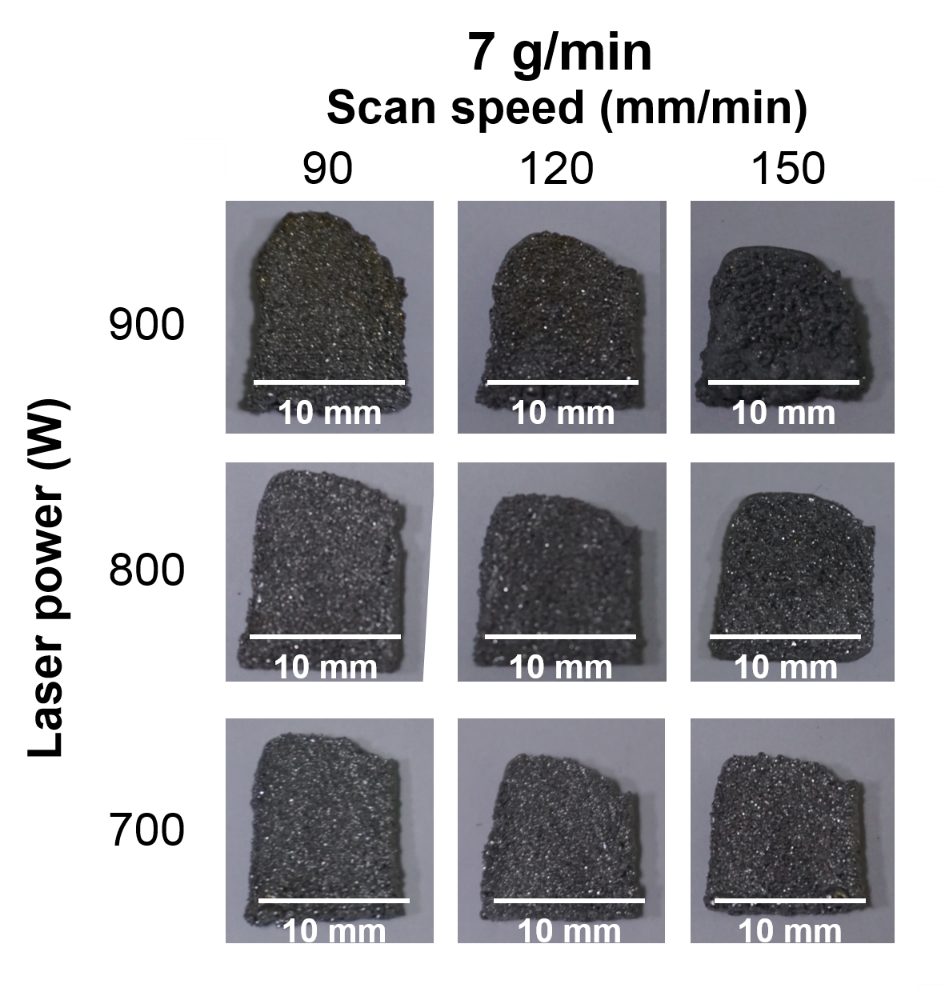


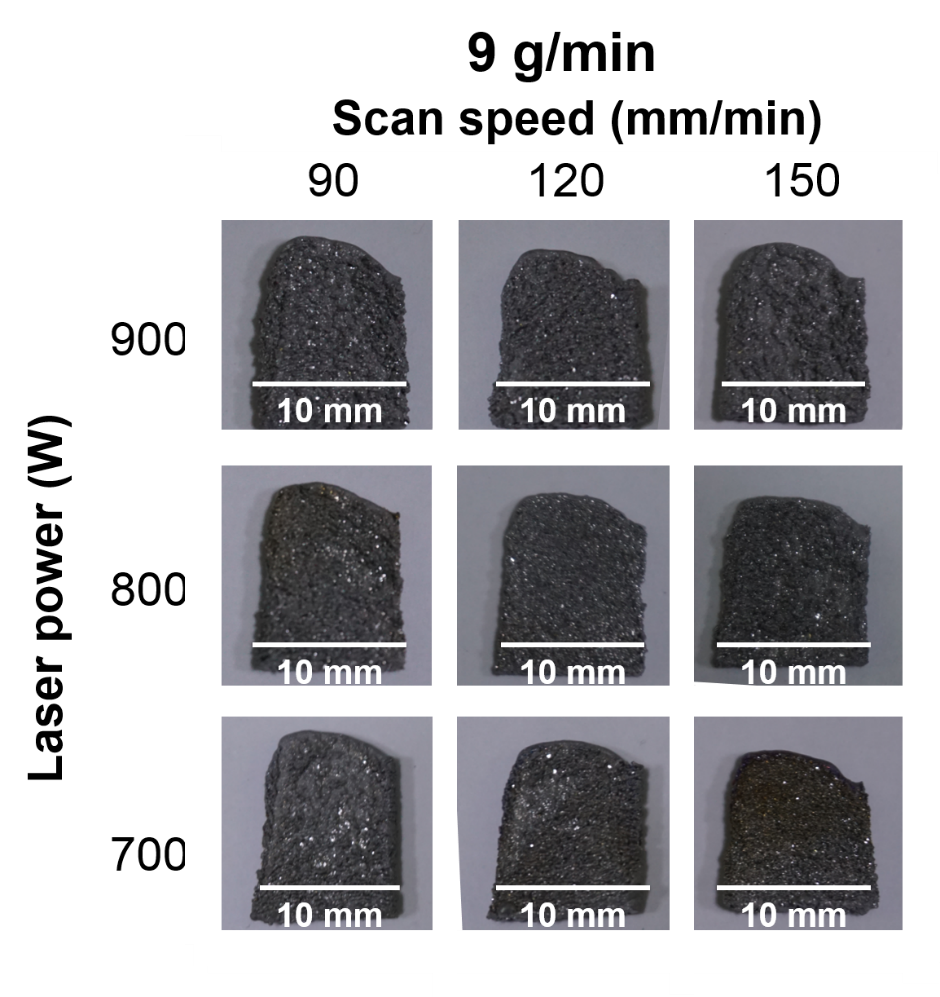


Figure S3. Samples fabricated at 7.2 m/s in carrier gas velocity.


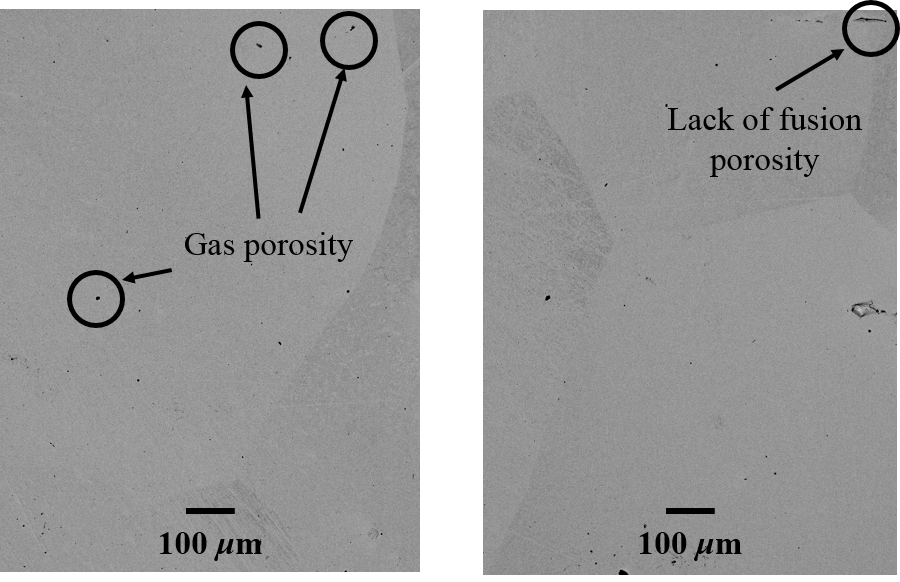


Figure S4. Typical cross-sectional images of DED-printed samples, showing gas porosities and lack of fusion porosities.





Figure S5. Oxygen content obtained from pure tungsten powders and DED-printed samples fabricated at different laser powers (*VL* =150 mm/min in, *M* = 9 g/min and *VC* =7.2 m/s).
